# Supplementary material
Source: PubMed Central journal article supplement (PMC10756932)
Supplement: NIHMS1926858-supplement-Supp1.pdf [file NIHMS1926858-supplement-Supp1.pdf]

## Supplementary materials

| Chr. | SNP 1      | SNP 2      | Position 1  | Position 2  | Size (bp)  |
|------|------------|------------|-------------|-------------|------------|
| 5    | rs341893   | rs2578628  | 8,467,900   | 10,242,162  | 1,774,262  |
| 5    | rs247206   | rs2190622  | 128,085,409 | 135,414,280 | 7,328,871  |
| 10   | rs993175   | rs7085249  | 4,450,357   | 5,243,017   | 792,660    |
| 10   | rs562950   | rs4554798  | 131,032,716 | 134,149,946 | 3,117,230  |
| 11   | rs12790085 | rs7939047  | 131,301,616 | 133,856,832 | 2,555,216  |
| 18   | rs9951431  | rs17090062 | 27,368,785  | 53,763,024  | 26,394,239 |
| 19   | rs11085177 | rs4239642  | 6,520,490   | 14,779,550  | 8,259,060  |

**Table S1.** Linkage analysis results showing heterozygous genomic loci shared between all cases in the studied family.

| Chr. | Position   | Reference Allele | Sample Allele | Variation | Gene Region | Gene Symbol | Transcript Variant | Protein Variant |
|------|------------|------------------|---------------|-----------|-------------|-------------|--------------------|-----------------|
| 18   | 28,979,241 | G                | A             | SNV       | Exonic      | DSG4        | c.1012G>A          | p.D338N         |
| 18   | 33,795,501 | A                | G             | SNV       | Exonic      | MOCOS       | c.1358A>G          | p.N453S         |
| 19   | 10,449,565 | C                | T             | SNV       | Exonic      | ICAM3       | c.136G>A           | p.G46R          |
| 19   | 11,170,525 | G                | A             | SNV       | Exonic      | SMARCA4     | c.4828G>A          | p.E1610K        |
| 19   | 11,558,353 | GAG              |               | Deletion  | Exonic      | PRKCSH      | c.966_968delGGA    | p.E325del       |

**Table S2.** Whole-exome sequencing results following variant analysis showing variants common to both tested cases.

| Gene<br>Symbol | Comments                                                                                                                                                                                                                                                                                                                                                                                                                                                                                                                                                            |
|----------------|---------------------------------------------------------------------------------------------------------------------------------------------------------------------------------------------------------------------------------------------------------------------------------------------------------------------------------------------------------------------------------------------------------------------------------------------------------------------------------------------------------------------------------------------------------------------|
| DSG4           | <ul style="list-style-type: none"> <li>- Protein expression profile does not match the phenotype: highest expression in bone marrow stem cells, heart, and hair follicles.</li> <li>- Although the specific amino acid is relatively conserved throughout evolution, several lower organisms carry the specific D&gt;N substitution.</li> <li>- Homozygous mutations in this gene were associated with hypotrichosis, an unrelated phenotype.</li> <li>- According to gnomAD this gene has a very low pLI (probability of loss-of-function intolerance).</li> </ul> |
| MOCOS          | <ul style="list-style-type: none"> <li>- According to gnomAD the allele frequency of this variant is 21/251060; pLI for this gene is very low.</li> <li>- This gene is mostly expressed in tissues unrelated to the phenotype: mononuclear cells, lung, adrenal, liver, placenta, testis.</li> <li>- This particular amino acid is not conserved at all throughout evolution; many organisms carry a p.N453D substitution.</li> <li>- Homozygous mutations in this gene are associated with Xanthinuria, an unrelated phenotype.</li> </ul>                         |
| ICAM3          | <ul style="list-style-type: none"> <li>- This gene is mostly expressed in tissues unrelated to the phenotype: blood and immune cells, mucous membranes.</li> <li>- The altered amino acid is relatively conserved throughout evolution; however, 3 different substitutions exist at this position in 3 different organisms; moreover, this amino acid is missing in ICAM3 orthologs in many lower organisms.</li> <li>- According to gnomAD this gene has a very low pLI.</li> </ul>                                                                                |

|               |                                                                                                                                                                                                                                                                                                                                                                                                                                               |
|---------------|-----------------------------------------------------------------------------------------------------------------------------------------------------------------------------------------------------------------------------------------------------------------------------------------------------------------------------------------------------------------------------------------------------------------------------------------------|
| <b>PRKCSH</b> | <p>- According to gnomAD the allele frequency of this variant is 75/244564, with no homozygotes; pLI for this gene is very low.</p> <p>- The deleted amino acid is not conserved throughout evolution at all; present only in 2 high primates and humans; there is an E&gt;V substitution in chimps.</p> <p>- Variants in this gene were previously associated with autosomal dominant polycystic kidney disease, an unrelated phenotype.</p> |
|---------------|-----------------------------------------------------------------------------------------------------------------------------------------------------------------------------------------------------------------------------------------------------------------------------------------------------------------------------------------------------------------------------------------------------------------------------------------------|

**Table S3.** Detailed description of variant filtration process for all otosclerosis-linked variants identified.

| <b>Gene/oligo</b>       | <b>primer</b> | <b>Sequence</b>                                                                                                                                   |
|-------------------------|---------------|---------------------------------------------------------------------------------------------------------------------------------------------------|
| <b>SMARCA<br/>Human</b> | Forward       | 5'-CTGCCCGATCTATGAAGAC-3'                                                                                                                         |
|                         | Reverse       | 5'-GGGAGGGCTGTGAAAAGCTG-3'                                                                                                                        |
| <b>Smarca4 - Mouse</b>  | Forward       | 5'-GTCCTTGCAGATCTATGAGG-3'                                                                                                                        |
|                         | Reverse       | 5'-AGCAAACCGTTAAGAGAGGC-3'                                                                                                                        |
| <b>sgRNA</b>            |               | TGAAGGCGAGGAAAGCGAGG                                                                                                                              |
| <b>ssODN*</b>           |               | GCTGCAGCGTCTGCCCTTCCCCCTTACTCACACTCA<br>GACTCGGAGCCTTCCTCCTCGCCCTCCTCCTtCTCCT<br>CGCTTTCCTCGCCTTCACTGTCGTCCTCCTTCTCAAT<br>CTTCTGCCGTACGCTGGTGAAGA |

**Table S4.** Oligos used to generate knock-in mice and primers used for Sanger sequencing. \*Mutation site denoted with a lower-case letter. ssODN, single-stranded donor oligonucleotides; sgRNA, short-guide RNA.
